# Supplementary material for: Pyk2 modulates hippocampal excitatory synapses and contributes to cognitive deficits in a Huntington's disease model
Source: PubMed Central journal article supplement (PMC5459995; doi:10.1038/ncomms15592), 2017-05-30
Supplement: ncomms15592-s1.pdf [file ncomms15592-s1.pdf]

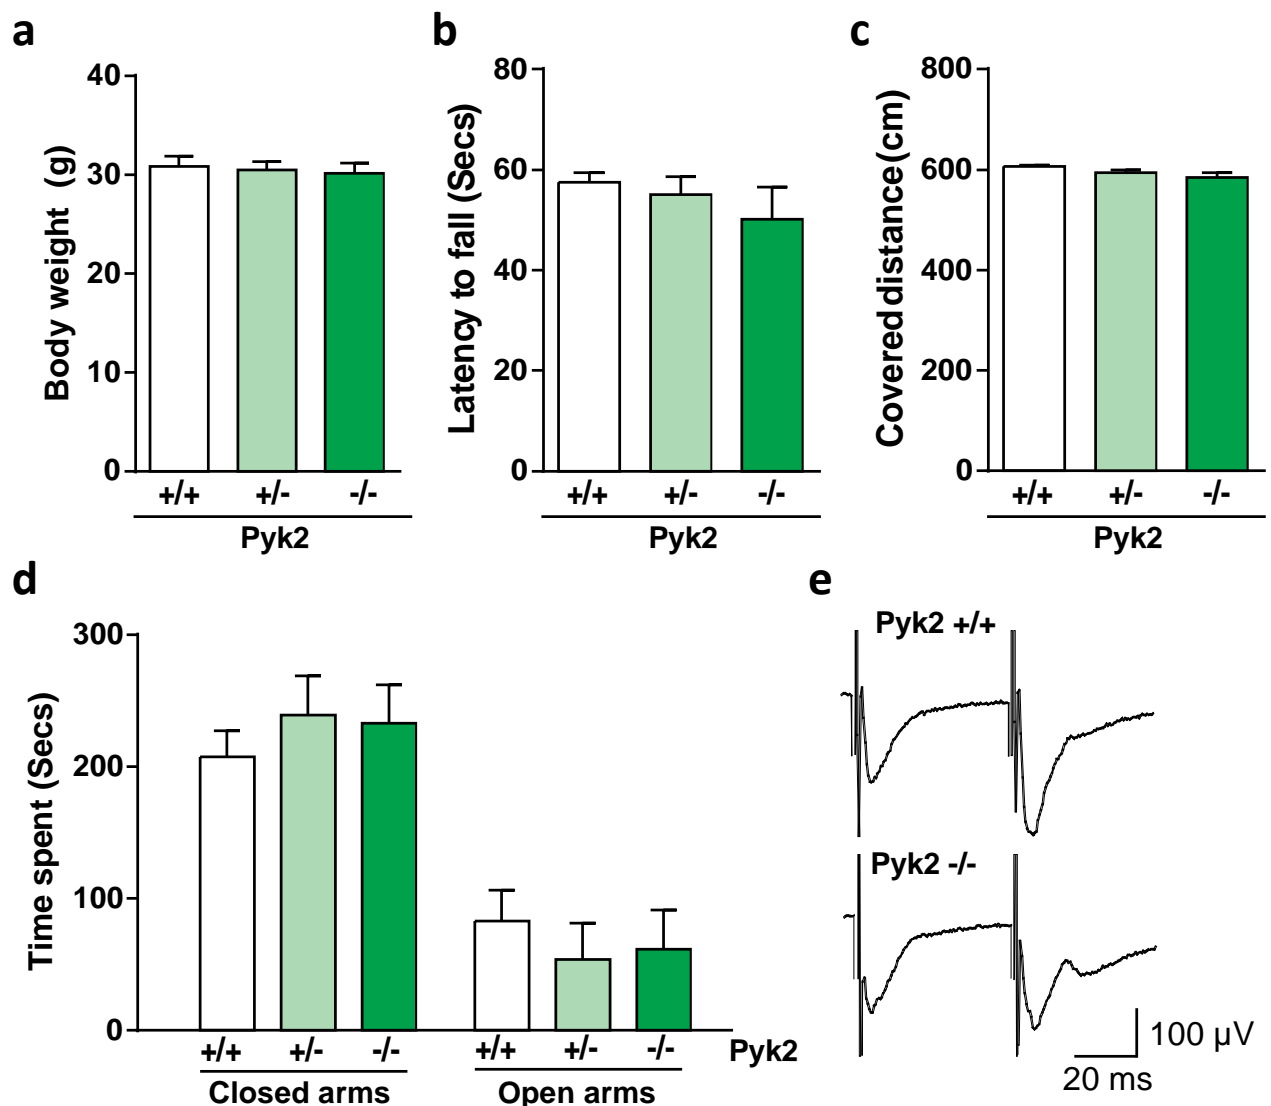

**Supplementary Figure 1. General behavioral characterization of Pyk2 deficient mice.** (a) Body weight and (b) muscular strength (measured by the wire hanging test) were monitored in Pyk2<sup>+/+</sup>, Pyk2<sup>+/-</sup> and Pyk2<sup>-/-</sup> mice. Kruskal-Wallis test **a**, 0.36,  $p = 0.834$ ; **b**, 0.447,  $p = 0.80$ . (c) Locomotor activity was measured in an open field for 15 min. One way ANOVA,  $F_{(2,24)} = 2.8$ ,  $p = 0.08$ . (d) The elevated plus maze paradigm was used to evaluate anxiety levels in mice of each genotype. Two-way ANOVA, no genotype effect ( $F_{(2,48)} = 0.02$ ,  $p = 0.97$ ). Values are means + SEM, 7-12 mice/genotype. (e) Sample traces of post-synaptic responses used to measure paired-pulse ratio in Fig. 1e.

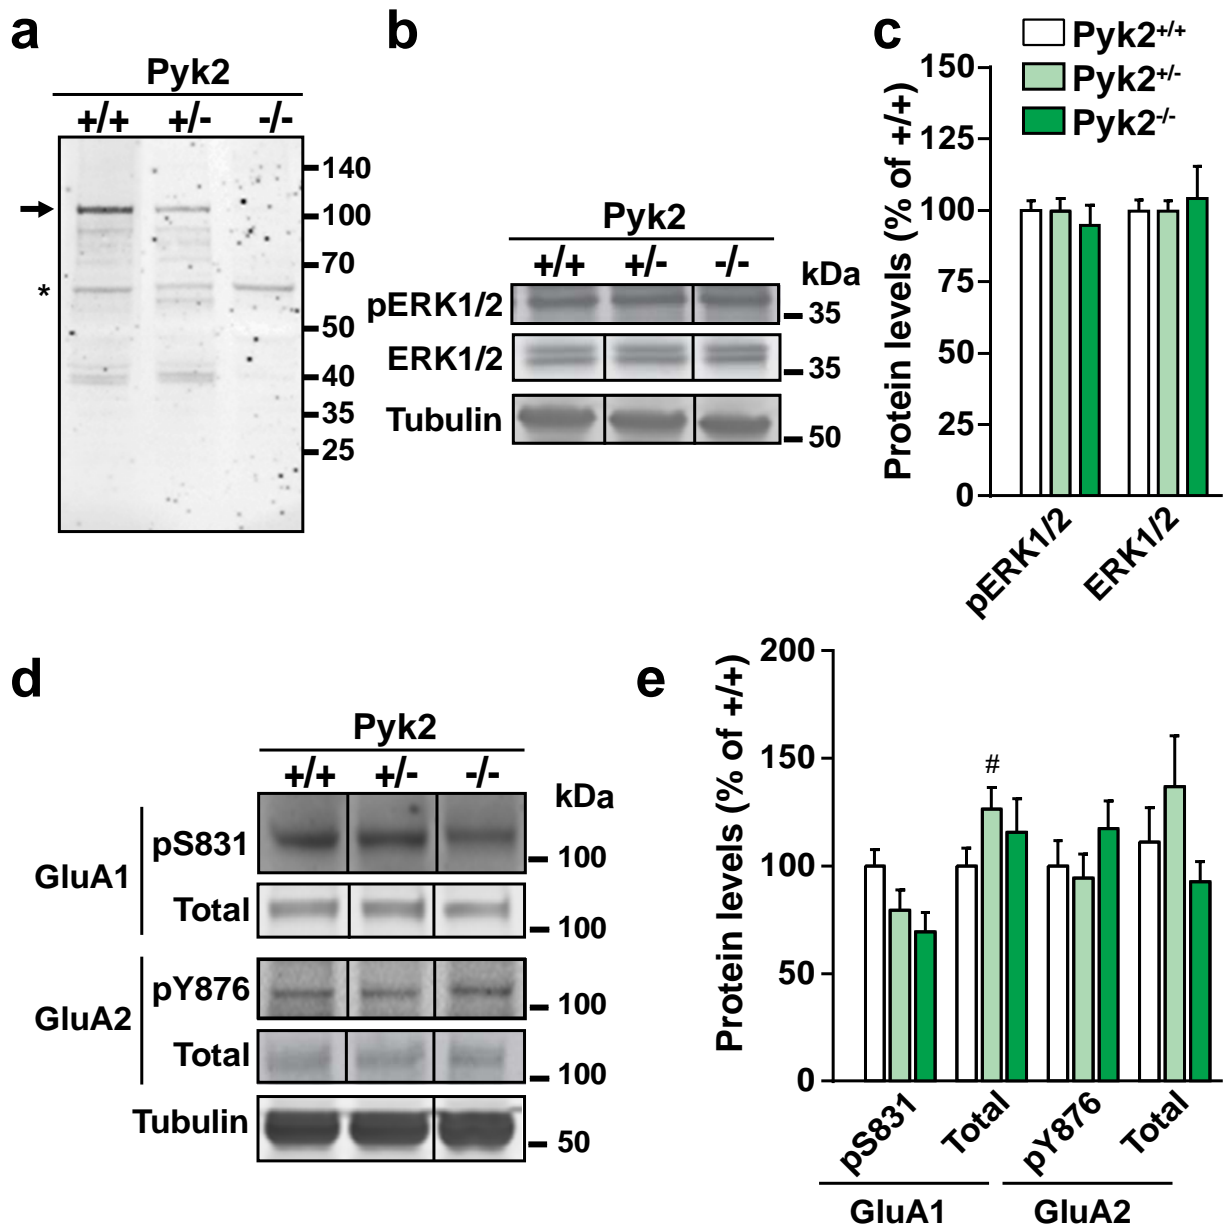

**Supplementary Figure 2. Synaptic protein levels in the hippocampus of Pyk2 deficient mice.** (a) Immunoblotting for Pyk2 with an antibody reacting with the N-terminal region. Pyk2 position is indicated by an arrow and a non-specific cross-reacting band by an asterisk. No additional fragment corresponding to a putative N-terminal domain of Pyk2 was detected in the Pyk2 KO sample. (b) Immunoblotting for total ERK1/2 and phosphoERK1/2, and  $\alpha$ -tubulin as a loading control in the hippocampus of Pyk2<sup>+/+</sup>, Pyk2<sup>+/-</sup>, and Pyk2<sup>-/-</sup> mice. (c) Quantification of results as in b. (d) Immunoblotting for phosphorylated forms and total GluA1 and GluA2 as indicated in Pyk2<sup>+/+</sup>, Pyk2<sup>+/-</sup>, and Pyk2<sup>-/-</sup> mice. (e) Quantification of results as in d. Values are means + SEM (n = 7-12/genotype). See **Supplementary Table 1** for statistical analysis. # p<0.05 as compared to wt. Mice were 3-month-old. Uncropped blots for b and d are shown in **Supplementary Figures 12** and **13**, respectively.

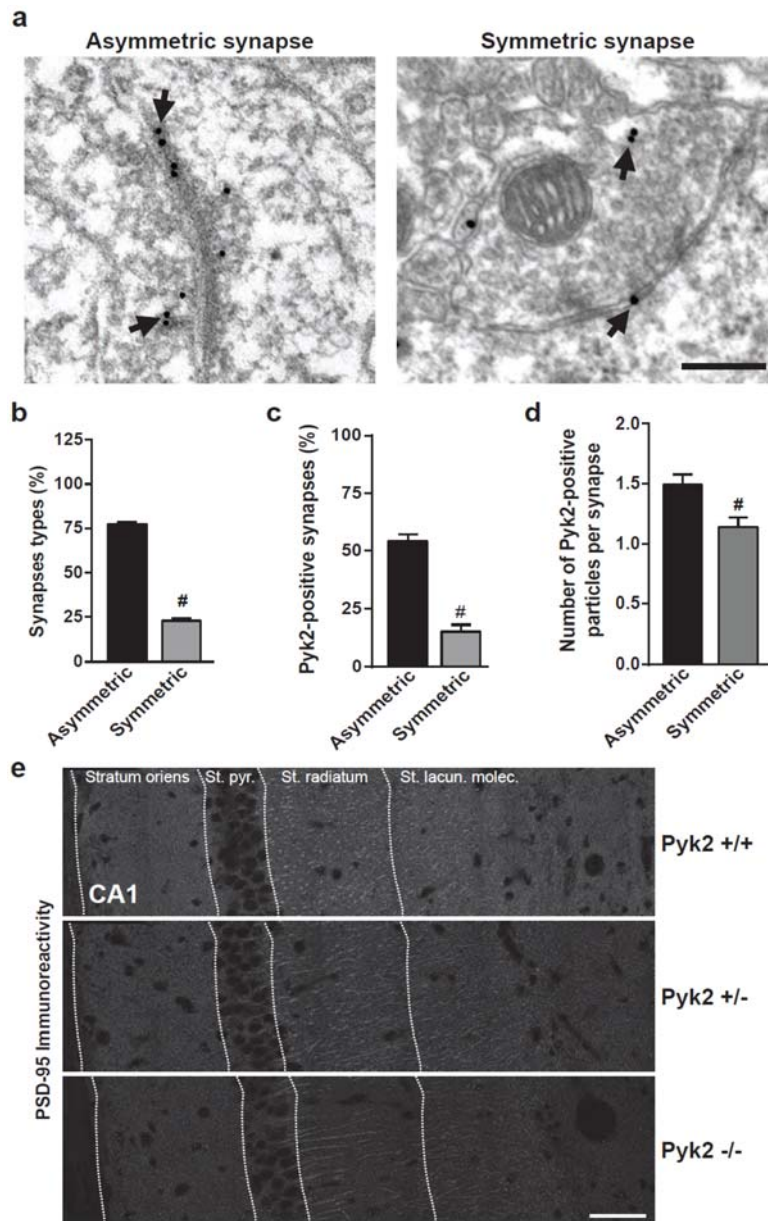

**Supplementary Figure 3. Ultrastructural localization of Pyk2 at synapses and distribution of PSD-95 in CA1.** (a) Electron microscopy images at 24 500 x in CA1 *stratum radiatum* of wild type mice were used to localize Pyk2-like immunoreactivity in asymmetric and symmetric synapses. Representative images of asymmetric synapse (left) and symmetric (right) synapse with Pyk2 immunoreactivity revealed by secondary immunogold particles. (b) Quantification of asymmetric and symmetric synapses in the *stratum radiatum* expressed as a percent of total number of synapses in the fields examined. Two-tailed Mann and Whitney's test,  $p = 0.03$ . (c) Percentage of asymmetric and symmetric synapses containing Pyk2-positive particles, 2-tailed Mann and Whitney's test,  $p = 0.03$ . (d) Number of Pyk2 immunogold particles in post-synaptic compartments of asymmetric and symmetric Pyk2-positive synapses (total of 136 synapses counted). Two-tailed Mann and Whitney's test,  $p = 0.02$ . **b-d**, Values are means + SEM (20-30 images from 4 Pyk2<sup>+/+</sup> mice). #  $p < 0.05$  as compared to asymmetric synapses. (e) Mosaic pictures of PSD-95 immunoreactivity (as in Fig. 3d) along the entire depth of CA1 from wild type (+/+) heterozygous (+/-) and homozygous (-/-) Pyk2 knockout mice. The limits of layers is indicated (dotted line), St. pyr., *stratum pyramidale*, St. lacun. molec., *stratum lacunosum moleculare*. Scale bar in **a**, 0.2  $\mu\text{m}$ , in **e**, 50  $\mu\text{m}$ .

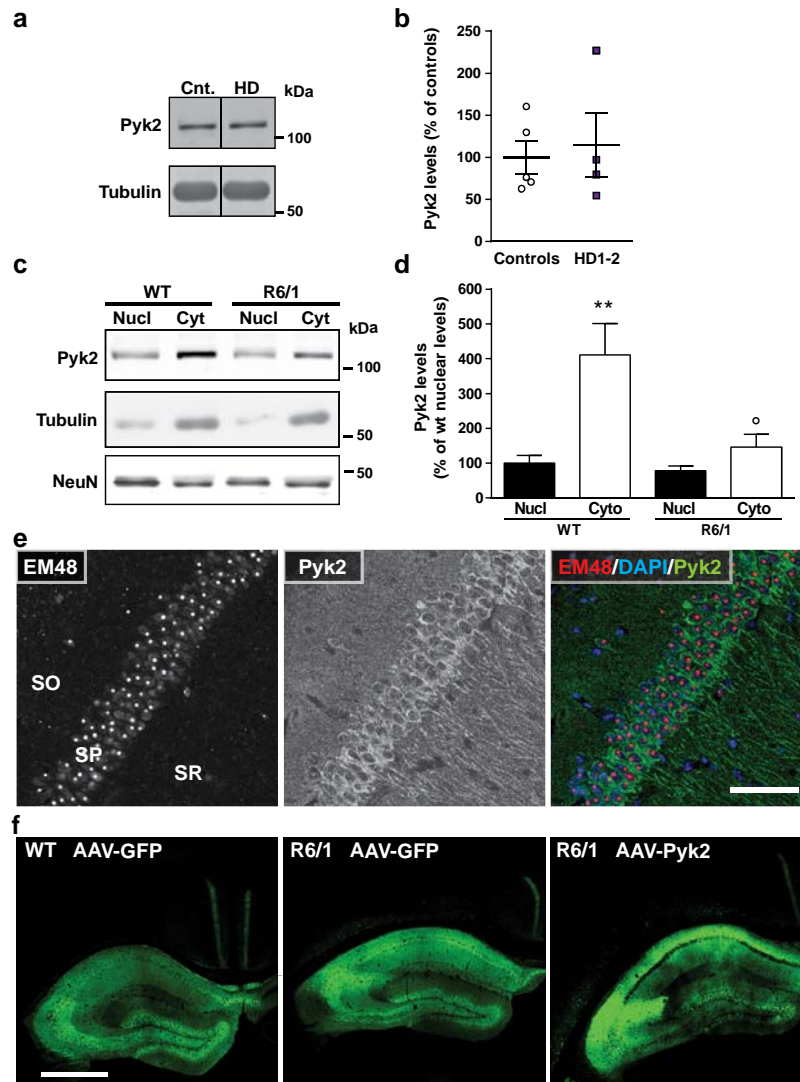

**Supplementary Figure 4. Pyk2 in low grade HD patients and in R6/1 mice.** (a) Hippocampal post-mortem samples from human patients grade 1-2 (HD1-2) and controls (Cnt.) were analyzed by immunoblotting for Pyk2 and  $\alpha$ -tubulin as a loading control. Molecular weight marker positions are indicated in kDa. (b) Densitometric quantification of results as in a expressed as a percentage of the mean in controls (controls, n = 5, HD1-2, n = 4). Student's t test,  $t_7 = 0.37$ , n.s. (c) Pyk2 is not sequestered in intra-nuclear inclusions and is specifically reduced in the cytosol in R6/1 mice. Immunoblotting for total Pyk2,  $\alpha$ -tubulin, and NeuN as controls in nuclear (Nucl) and cytoplasmic (Cyto) fractions of the hippocampus from wild type (WT) and R6/1 mice. (d) Quantification of results as in c for Pyk2. Values are means + SEM. Two-way ANOVA: localization effect,  $F_{(1,16)}=9.93$ ,  $p=0.006$ , genotype effect,  $F_{(1,16)}=5.66$ ,  $p=0.03$ , interaction  $F_{(1,16)}=4.04$ ,  $p=0.06$ . Holm-Sidak's test, cytoplasm vs nucleus, \*\*  $p<0.01$ , R6/1 vs WT, °  $p<0.05$ . (e) Confocal microscopy images of double immunofluorescence for EM48 (red) and Pyk2 (green) in CA1 of R6/1 mice. SO, *stratum oriens*, SP, *stratum pyramidale*, SR, *stratum radiatum*. Scale bar, 25  $\mu$ m. (f) GFP fluorescence distribution in the hippocampus and adjacent cortex of WT and R6/1 mice which received intra-hippocampal injections of AAV expressing GFP (AAV-GFP) or Pyk2 and GFP (AAV-Pyk2). Stitched confocal images. Scale bar 200  $\mu$ m. Uncropped blots for a and c are shown in **Supplementary Figures 14** and **15**, respectively.

**Supplementary Figure 5.** Full-size immunoblots related to Fig. 2a. Red boxes indicate regions shown in the corresponding Figure. Molecular weight markers positions (kDa).

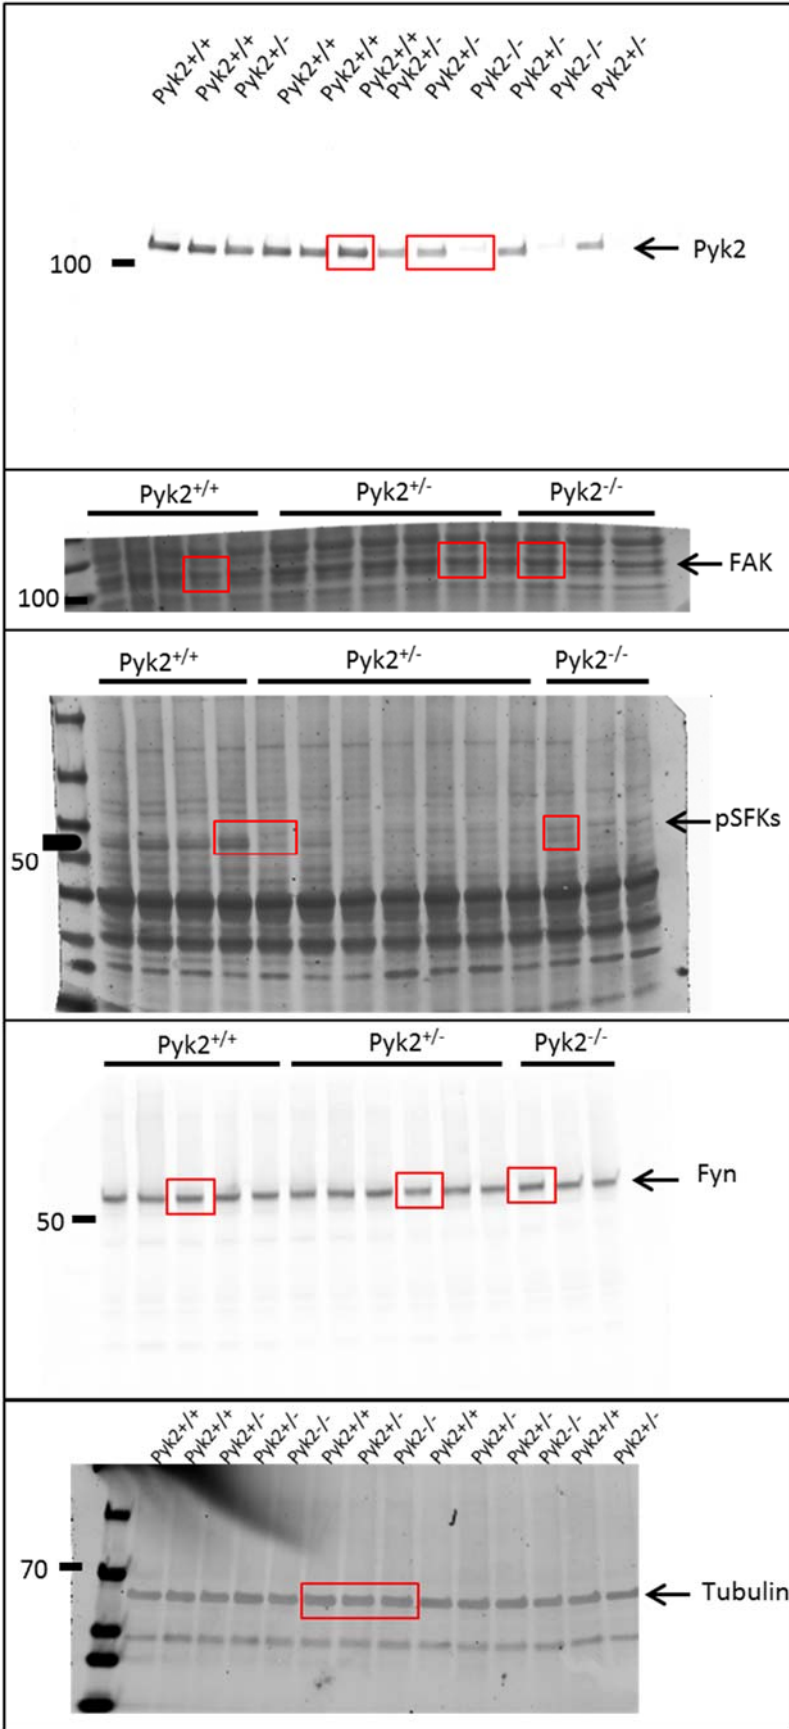

**Supplementary Figure 6.**  
 Full-size immunoblots related to Fig. 2c. Red boxes indicate regions shown in the corresponding Figure. Molecular weight markers positions (kDa).

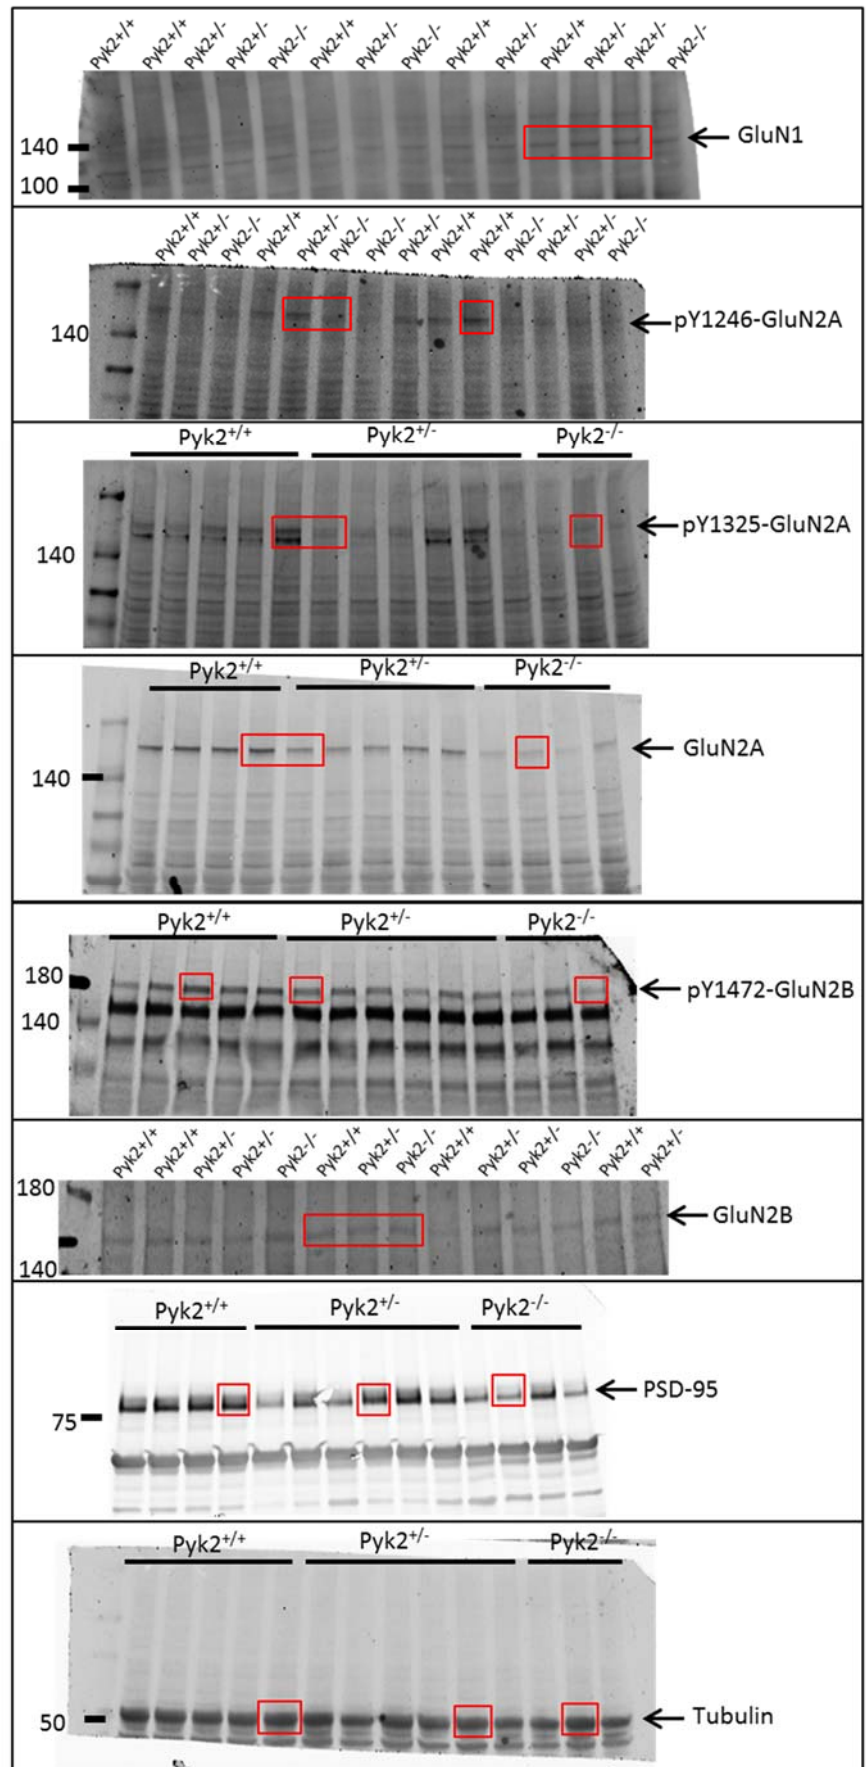

**Supplementary Figure 7.** Full-size immunoblots related to Fig. 2e. Red boxes indicate regions shown in the corresponding Figure. Molecular weight markers positions (kDa).

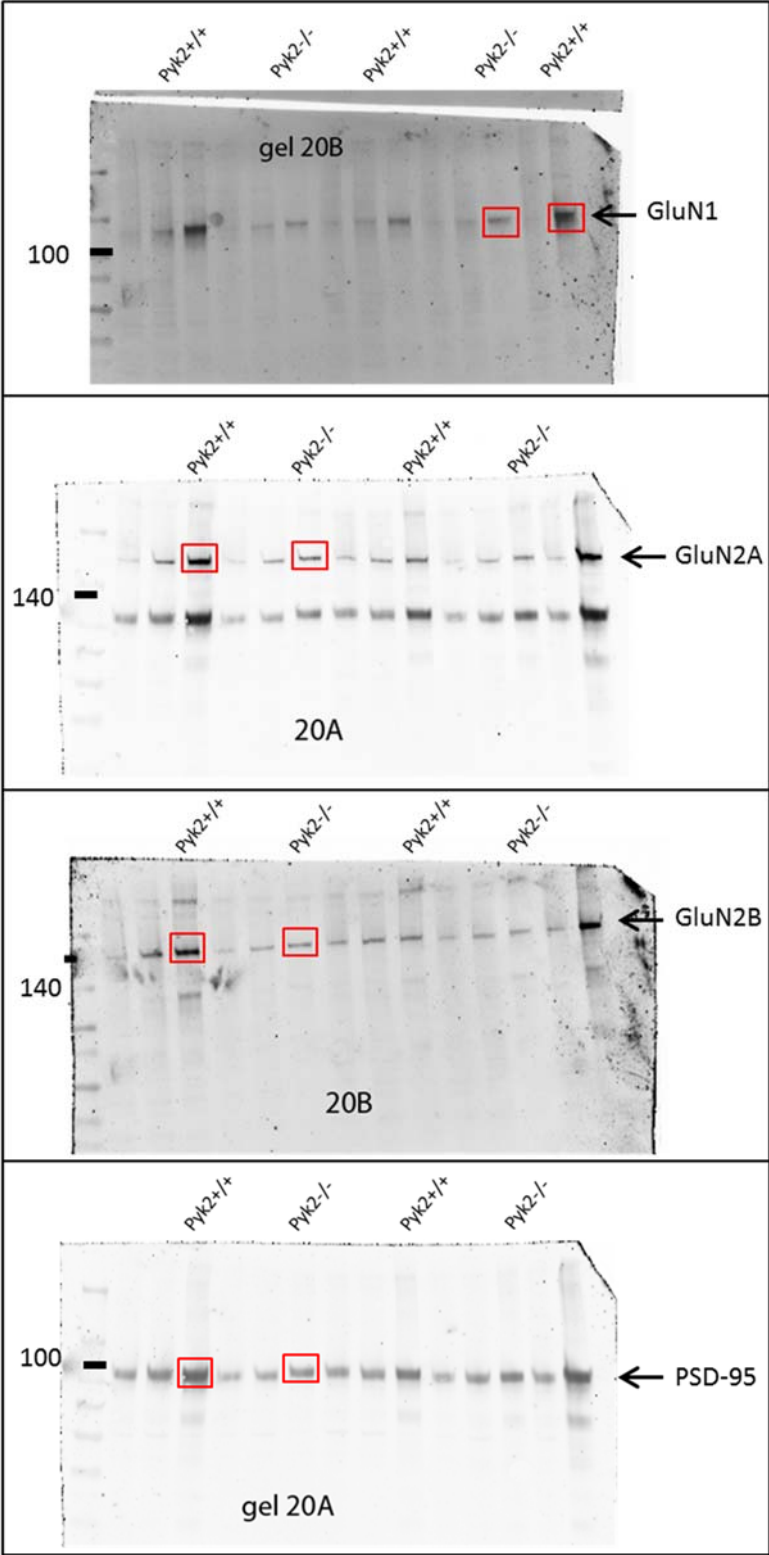

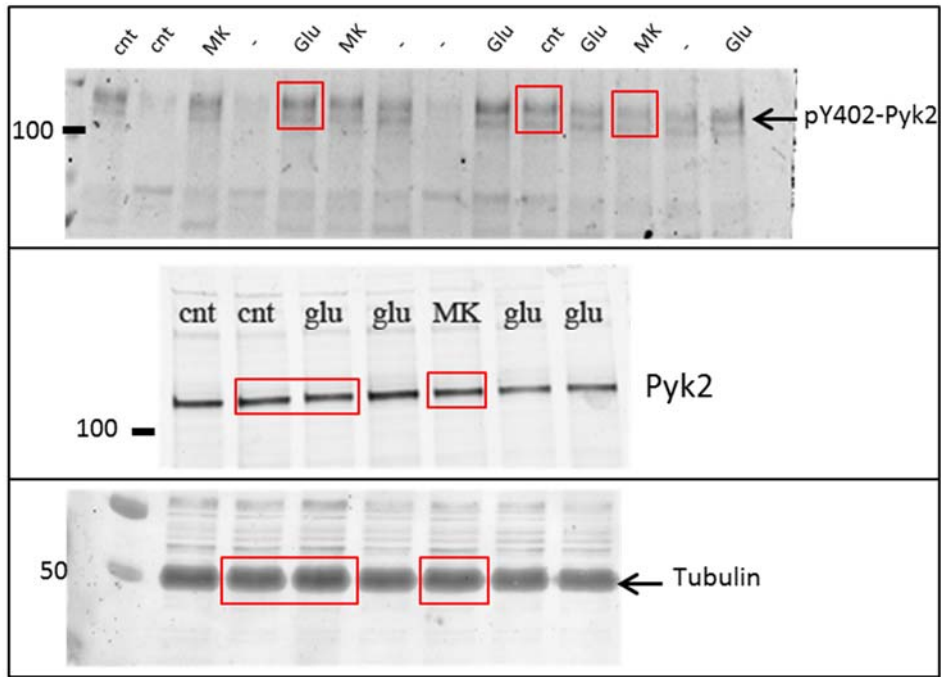

**Supplementary Figure 8.** Full-size immunoblots related to Fig. 5a. Red boxes indicate regions shown in the corresponding Figure. Molecular weight markers positions (kDa).

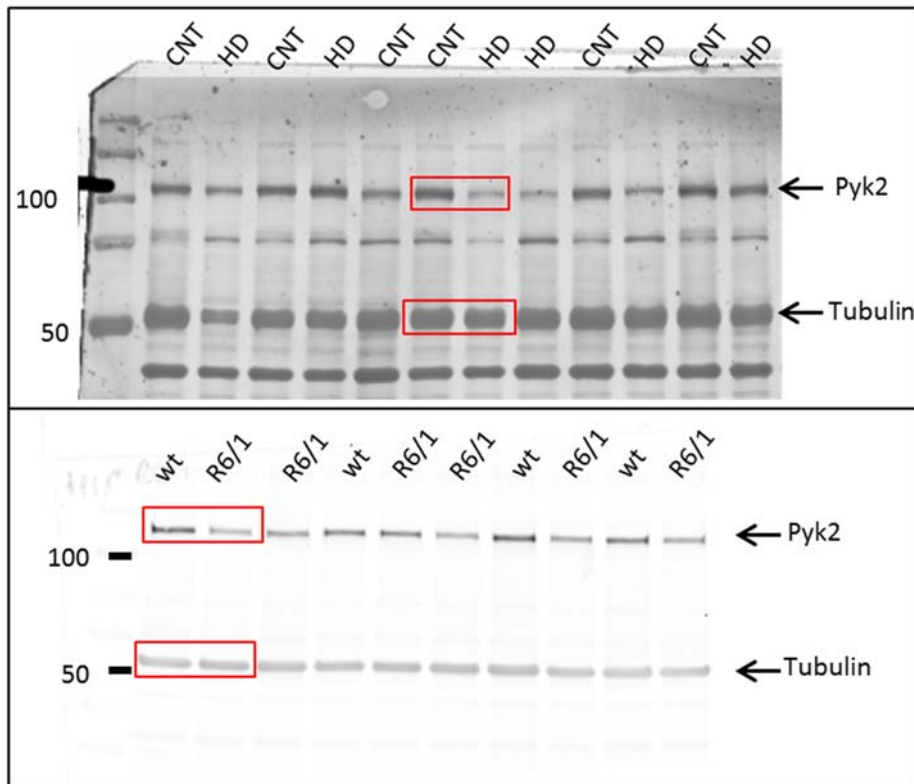

**Supplementary Figure 9.** Full-size immunoblots related to Fig. 7a. Red boxes indicate regions shown in the corresponding Figure. Molecular weight markers positions (kDa).



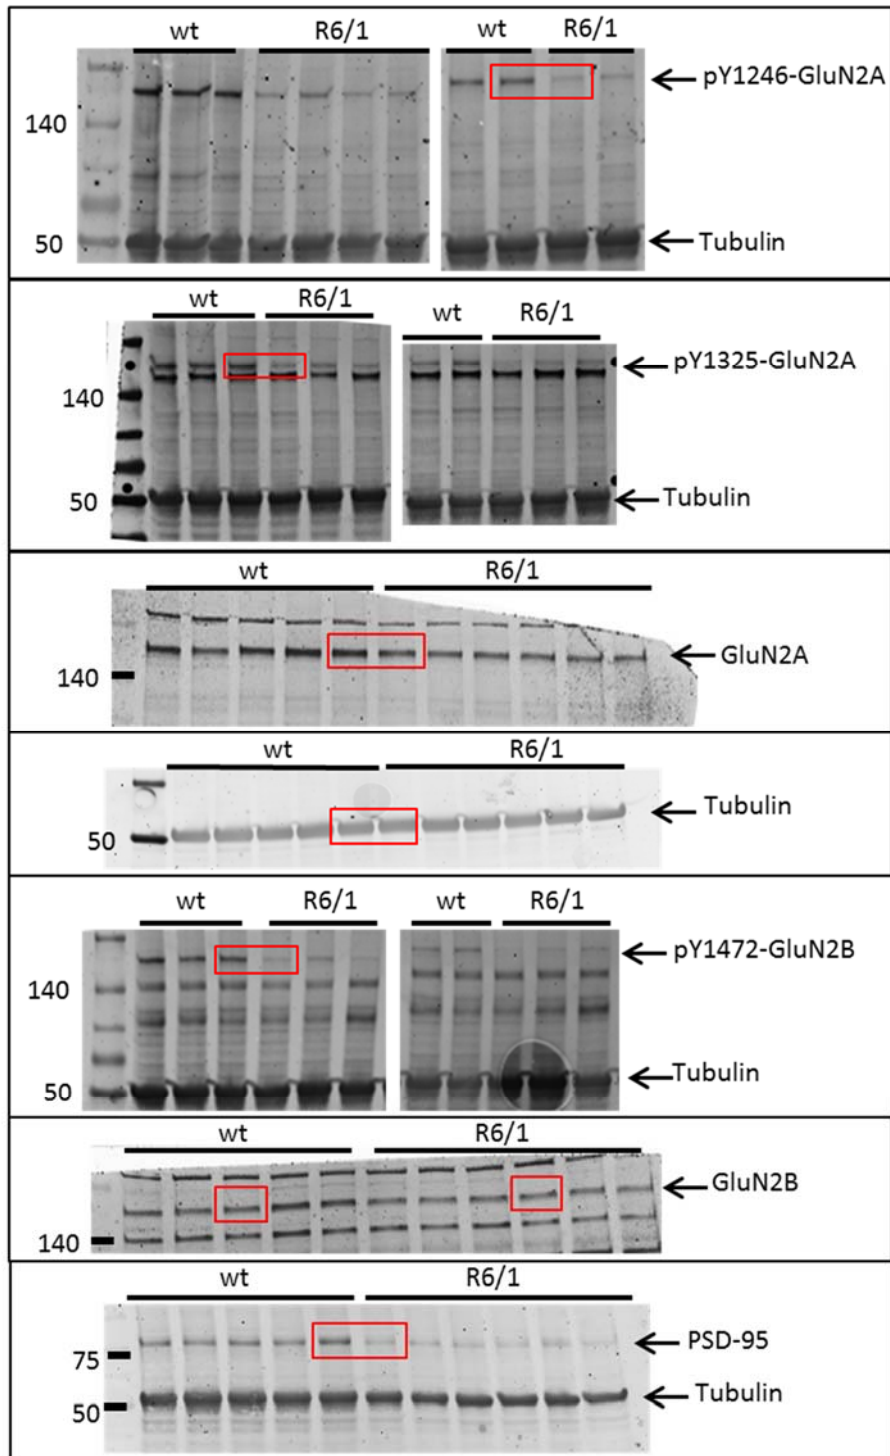

**Supplementary Figure 10.** Full-size immunoblots related to Fig. 7d. Red boxes indicate regions shown in the corresponding Figure. Molecular weight markers positions (kDa).

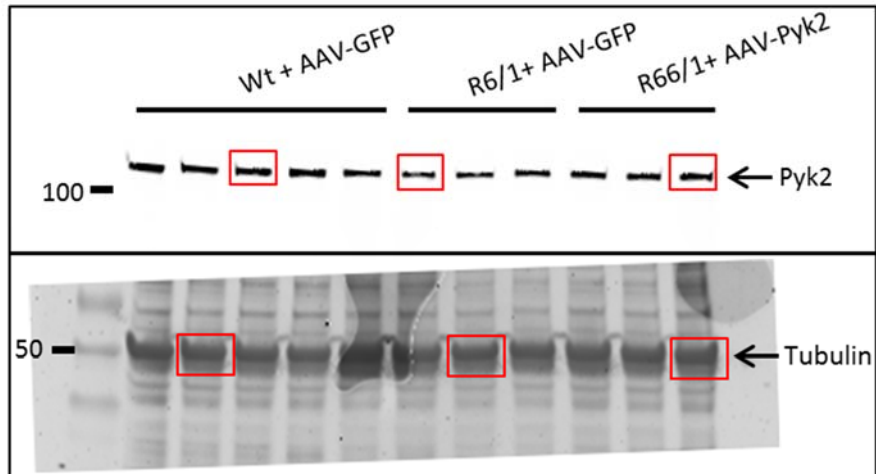

**Supplementary Figure 11.** Full-size immunoblots related to Fig. 8a. Red boxes indicate regions shown in the corresponding Figure. Molecular weight markers positions (kDa).

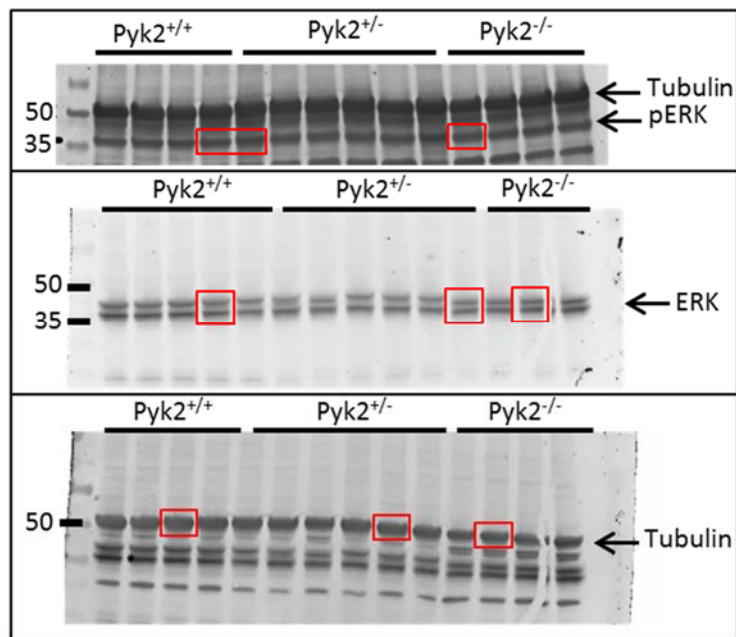

**Supplementary Figure 12.** Full-size immunoblots related to Supplementary Figure 2b. Red boxes indicate regions shown in the corresponding Figure. Molecular weight markers positions (kDa).

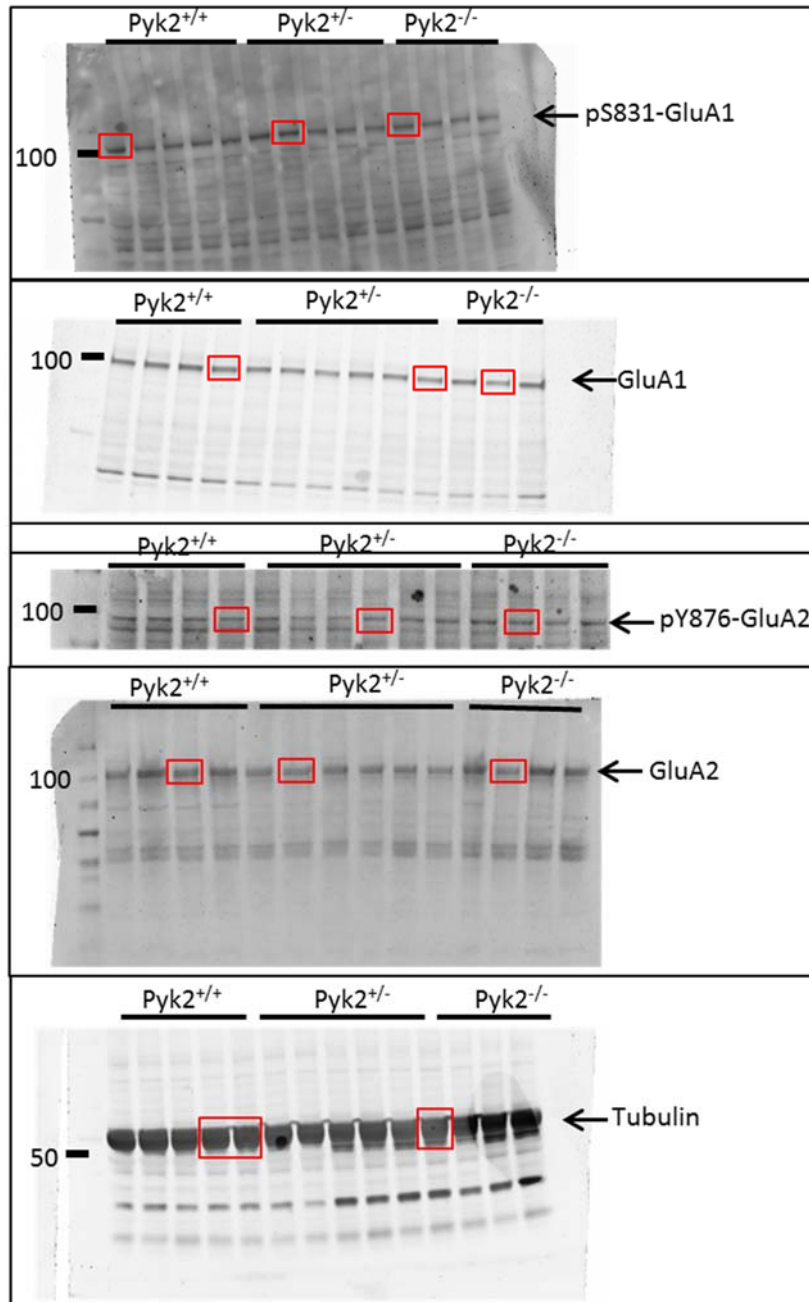

**Supplementary Figure 13.** Full-size immunoblots related to Supplementary Figure 2d. Red boxes indicate regions shown in the corresponding Figure. Molecular weight markers positions (kDa).

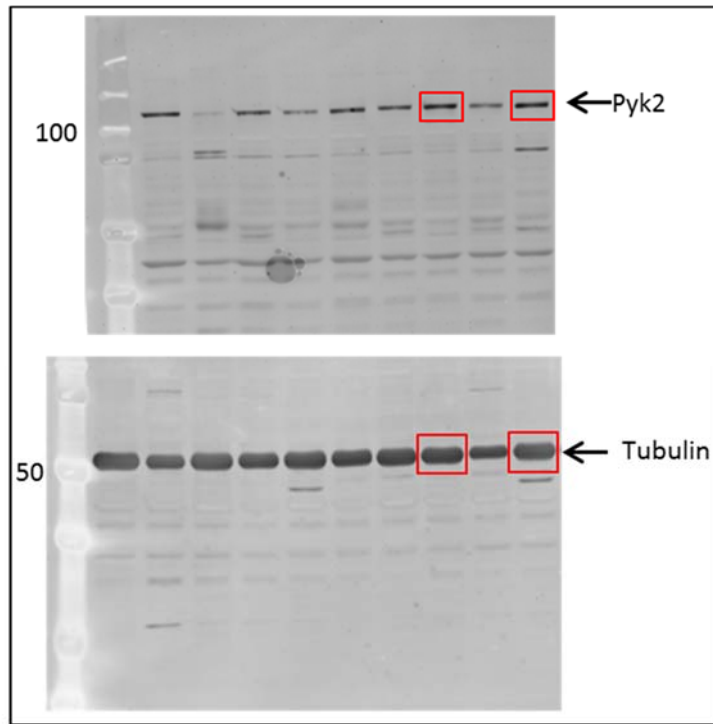

**Supplementary Figure 14.** Full-size immunoblots related to Supplementary Figure 4a. Red boxes indicate regions shown in the corresponding Figure. Molecular weight markers positions (kDa).

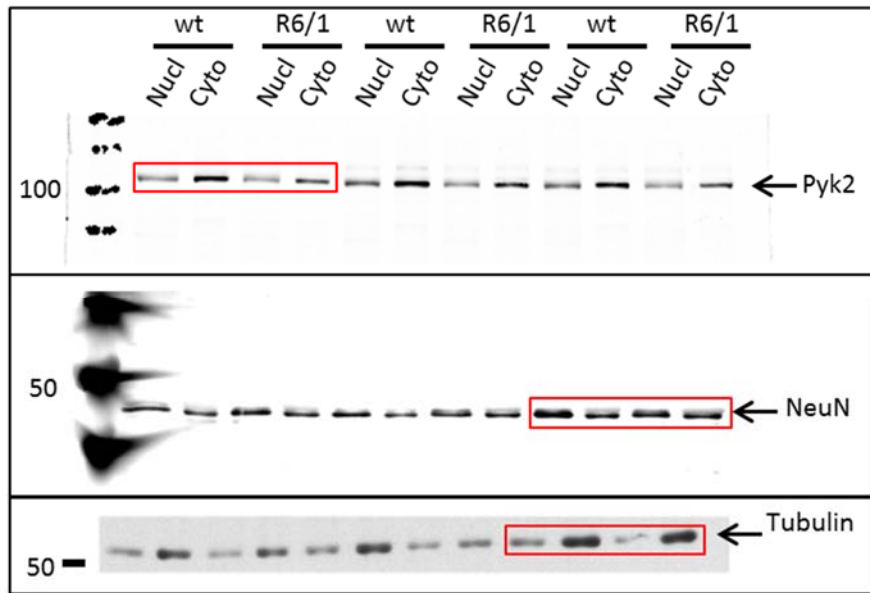

**Supplementary Figure 15.** Full-size immunoblots related to Supplementary Figure 4c. Red boxes indicate regions shown in the corresponding Figure. Molecular weight markers positions (kDa).

**Supplementary Table 1: Statistical analysis values for Fig. 2 and Suppl. Fig. 2**

|               | Normality test |     |     |                    |     |     |              |     |     | Dunn's test    |        |            |            |            | Holm Sidak's test |       |                   |            |                   |            |                   |            |                   |
|---------------|----------------|-----|-----|--------------------|-----|-----|--------------|-----|-----|----------------|--------|------------|------------|------------|-------------------|-------|-------------------|------------|-------------------|------------|-------------------|------------|-------------------|
|               | n              |     |     | d'Agostino Pearson |     |     | Shapiro Wilk |     |     | Kruskal Wallis |        | +/- vs +/+ | -/- vs +/+ | -/- vs +/- | One way ANOVA     |       |                   | +/- vs +/+ |                   | -/- vs +/+ |                   | -/- vs +/- |                   |
|               | +/+            | +/- | -/- | +/+                | +/- | -/- | +/+          | +/- | -/- | KW             | p      | p          | p          | p          | DF1, DF2          | F     | p                 | t          | p                 | t          | p                 | t          | p                 |
| ERK           | 9              | 12  | 7   | Yes                | Yes | nts | Yes          | Yes | Yes |                |        |            |            |            | 2, 25             | 0.15  | ns                |            |                   |            |                   |            |                   |
| pERK          | 9              | 12  | 7   | Yes                | Yes | nts | Yes          | Yes | Yes |                |        |            |            |            | 2, 25             | 0.31  | ns                |            |                   |            |                   |            |                   |
| FAK           | 9              | 10  | 4   | Yes                | Yes | nts | Yes          | Yes | nts |                |        |            |            |            | 2, 20             | 0.31  | ns                |            |                   |            |                   |            |                   |
| Fyn           | 9              | 99  | 8   | Yes                | Yes | Yes | Yes          | Yes | Yes |                |        |            |            |            | 2, 23             | 1.13  | ns                |            |                   |            |                   |            |                   |
| pY418Fyn/SFK  | 9              | 11  | 8   | Yes                | Yes | Yes | Yes          | Yes | Yes |                |        |            |            |            | 2, 25             | 15.84 | <10 <sup>-4</sup> | 4.07       | <10 <sup>-3</sup> | 5.42       | <10 <sup>-4</sup> | 1.74       | ns                |
| GluA1         | 9              | 9   | 8   | Yes                | Yes | No  | Yes          | Yes | No  | 6.13           | 0.047  | ns         | *          | ns         |                   |       |                   |            |                   |            |                   |            |                   |
| GluA1 pS831   | 9              | 12  | 7   | Yes                | Yes | nts | Yes          | Yes | Yes |                |        |            |            |            | 2, 25             | 2.60  | ns                |            |                   |            |                   |            |                   |
| GluA2         | 9              | 10  | 8   | Yes                | Yes | Yes | Yes          | Yes | Yes |                |        |            |            |            | 2, 24             | 1.43  | ns                |            |                   |            |                   |            |                   |
| GluA2 pY876   | 9              | 11  | 7   | No                 | No  | Yes | No           | No  | nts | 1.93           | 0.38   |            |            |            |                   |       |                   |            |                   |            |                   |            |                   |
| GluN1         | 9              | 11  | 7   | Yes                | Yes | nts | Yes          | Yes | Yes |                |        |            |            |            | 2, 24             | 0.40  | ns                |            |                   |            |                   |            |                   |
| GluN2A        | 9              | 11  | 7   | Yes                | Yes | nts | Yes          | No  | Yes | 17.5           | 0.0002 | ns         | ****       | ns         |                   |       |                   |            |                   |            |                   |            |                   |
| pY1246-GluN2A | 9              | 11  | 7   | Yes                | Yes | nts | No           | Yes | Yes | 6.64           | 0.036  | ns         | *          | ns         |                   |       |                   |            |                   |            |                   |            |                   |
| pY1325-GluN2A | 9              | 11  | 7   | Yes                | No  | nts | Yes          | No  | Yes | 15.40          | 0.0005 | ns         | ***        | ns         |                   |       |                   |            |                   |            |                   |            |                   |
| GluN2B        | 8              | 11  | 7   | Yes                | No  | nts | Yes          | No  | Yes | 3.16           | 0.21   |            |            |            |                   |       |                   |            |                   |            |                   |            |                   |
| GluN2B pY1472 | 8              | 11  | 7   | Yes                | Yes | nts | Yes          | Yes | Yes |                |        |            |            |            | 2, 23             | 13.93 | <10 <sup>-3</sup> | 3.00       | <0.05             | 5.27       | <10 <sup>-4</sup> | 2.75       | <0.05             |
| PSD-95        | 9              | 12  | 7   | Yes                | Yes | nts | Yes          | Yes | Yes |                |        |            |            |            | 2, 25             | 9.51  | <10 <sup>-3</sup> | 1.92       | ns                | 4.35       | <10 <sup>-3</sup> | 2.83       | <0.05             |
| Pyk2          | 6              | 4   | 4   | nts                | nts | nts | nts          | nts | nts |                |        |            |            |            | 2, 11             | 156.9 | <10 <sup>-4</sup> | 8.23       | <10 <sup>-4</sup> | 17.67      | <10 <sup>-4</sup> | 8.61       | <10 <sup>-4</sup> |

For each protein or phosphorylated form the number of mice (n) is indicated. Normality was tested with d'Agostino-Pearson and Shapiro-Wilk tests. If the distribution was not normal (p<0.05, No), further analysis was done with Kruskal-Wallis (value, KW), and Dunn's test for multiple comparisons. When the distribution was not different from normal (Yes), one-way ANOVA and multiple comparisons with Holm Sidak's test were used. The degrees of freedom (DF1, DF2), the F value, and the corresponding p value are indicated for each ANOVA. ns, not significant, nts, number too small for the test.
